# Supplementary material for: Nicotinamide riboside improves muscle mitochondrial biogenesis, satellite cell differentiation, and gut microbiota in a twin study
Source: PubMed Central journal article supplement (PMC9839336; doi:10.1126/sciadv.add5163), 2023-01-13
Supplement: sciadv.add5163_sm.pdf [file sciadv.add5163_sm.pdf]

Supplementary Materials for

**Nicotinamide riboside improves muscle mitochondrial biogenesis, satellite cell differentiation, and gut microbiota in a twin study**

Helena A. K. Lapatto *et al.*

Corresponding author: Eija Pirinen, [eija.pirinen@helsinki.fi](mailto:eija.pirinen@helsinki.fi); Kirsi H. Pietiläinen, [kirsi.pietilainen@helsinki.fi](mailto:kirsi.pietilainen@helsinki.fi)

*Sci. Adv.* **9**, eadd5163 (2022)  
DOI: 10.1126/sciadv.add5163

**The PDF file includes:**

Figs. S1 to S3  
Tables S1, S8 to S10

**Other Supplementary Material for this manuscript includes the following:**

Tables S2 to S7

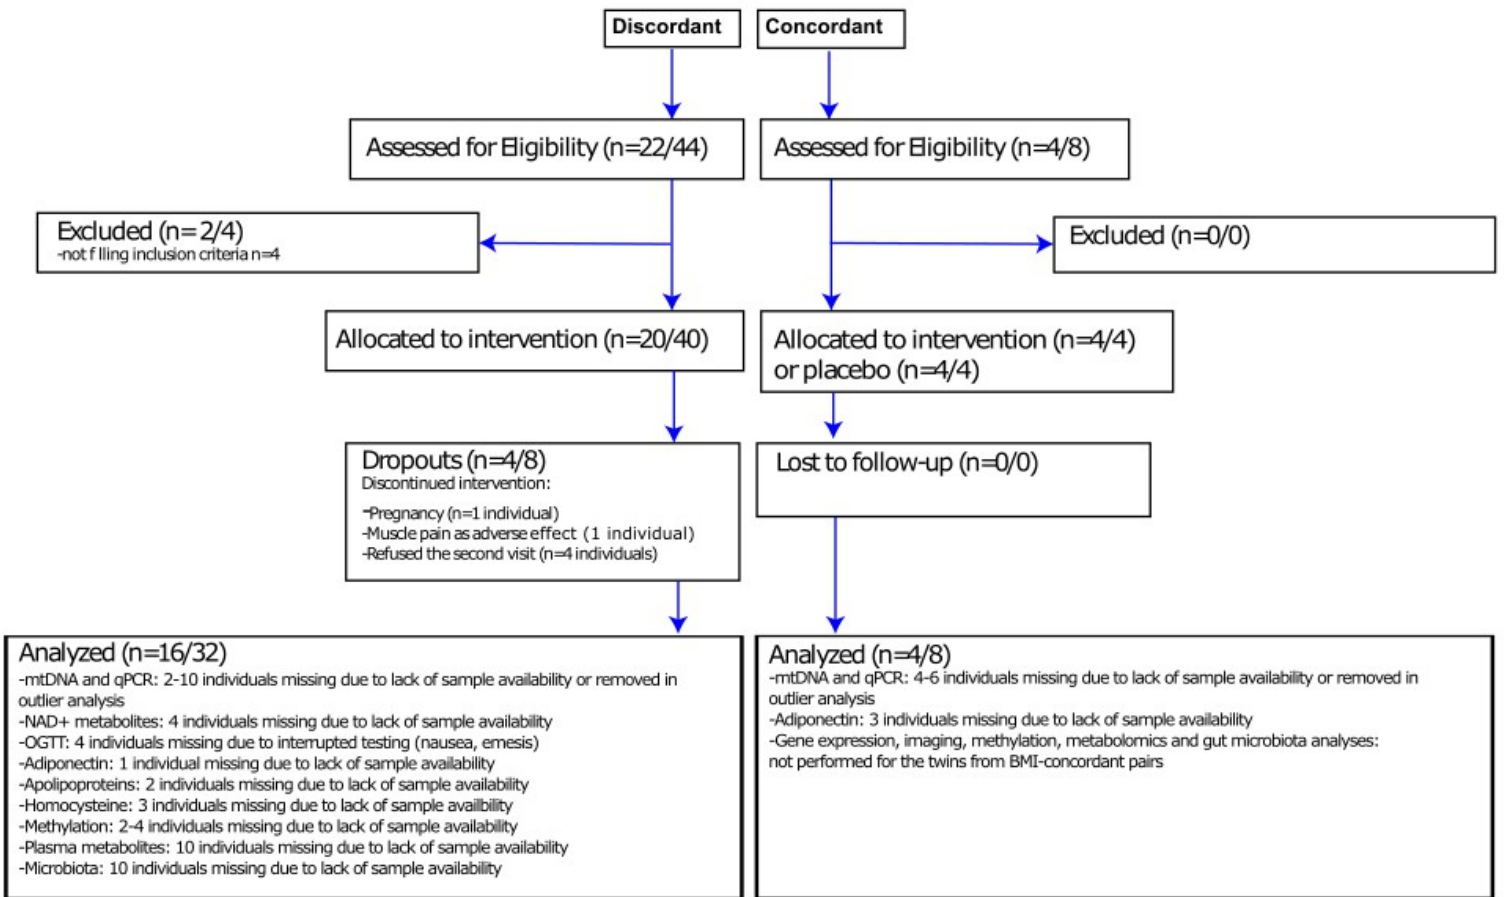

**Fig. S1. Flow chart illustrating the procedures for the selection of study participants and data analyses. Related to Fig. 1A. Presented as (n=number of twin pairs/number of individuals).**

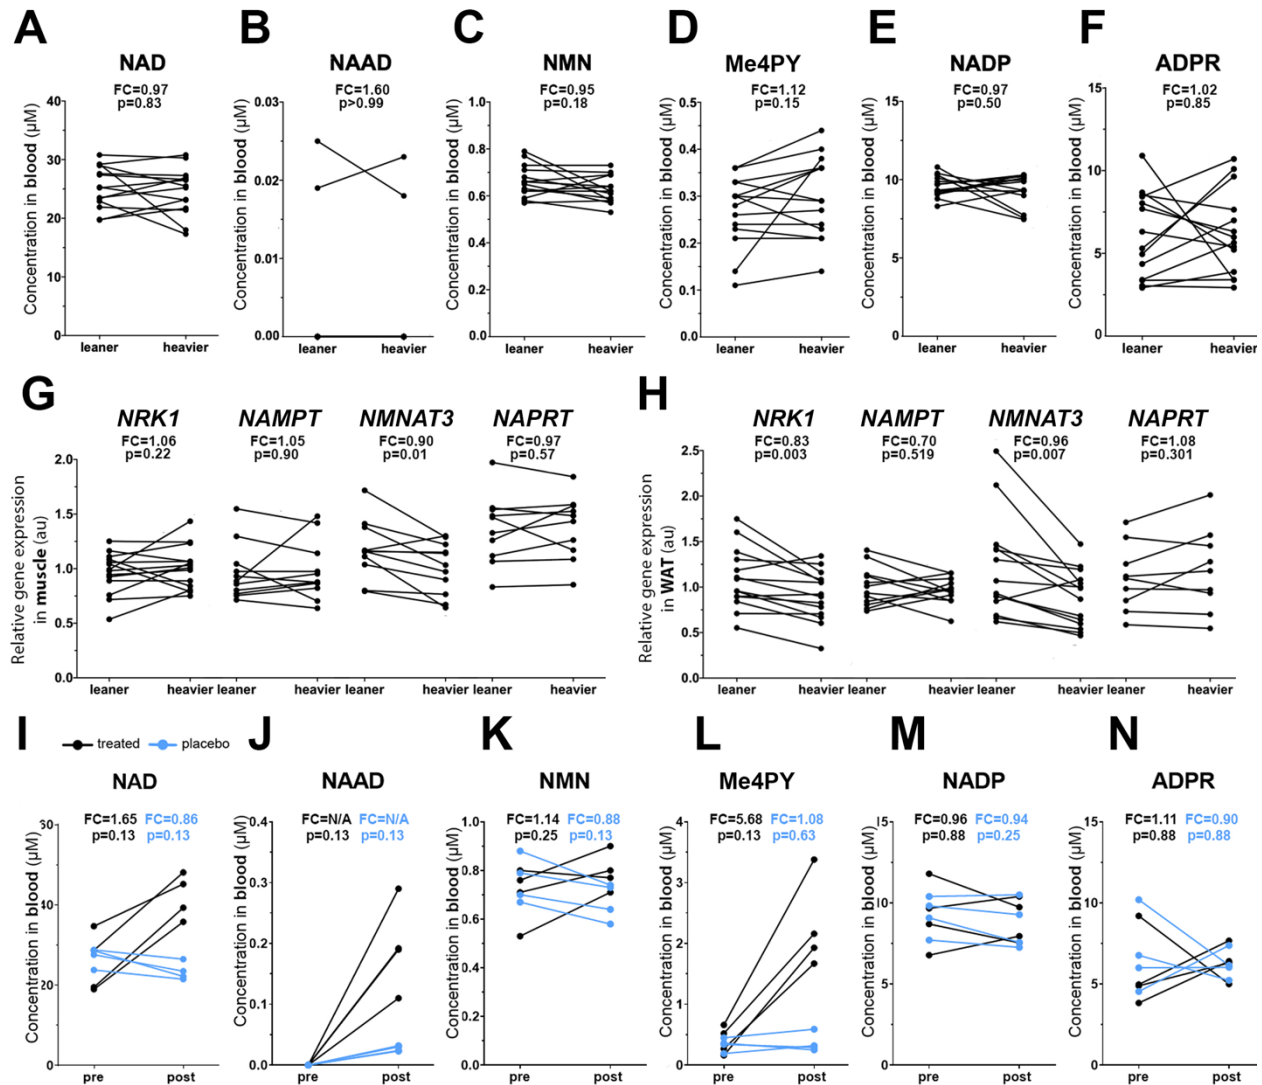

**Fig. S2. Baseline NAD<sup>+</sup> metabolism in the twins from the BMI-discordant pairs and the effect of placebo and NR treatments on NAD metabolome in the twins from the BMI-concordant pairs. Related to Fig. 1. Number of analyzed study participants is presented as n=number of full twin pairs/number of individuals.**

**(A-F)** The concentration of whole blood NAD metabolites at baseline in the twins from the BMI-discordant pairs (n=14 pairs/28 individuals).

**(G)** Expression of genes associated with NAD<sup>+</sup> biosynthesis in muscle at baseline in the twins from the BMI-discordant pairs (n=11-15 pairs/22-30 individuals).

**(H)** Expression of genes associated with NAD<sup>+</sup> biosynthesis in WAT at baseline in the twins from the BMI-discordant pairs (n= 9-14 pairs/18-28 individuals).

**(I-N)** The concentration of whole blood NAD metabolites in placebo and NR-treated BMI-concordant twin pairs (n=4 pairs/8 individuals). One cotwin of the twin pair was treated with NR (in black) and the other cotwin with placebo (in blue).

Pre and post value of each individual is connected with a line. Fold change (FC) indicates either the mean of the heavier cotwin values divided with the leaner cotwin values (baseline graphs) or the post NR values divided by the pre NR values (pre versus post graphs). FC could not be

calculated for NAAD as its concentration at baseline was zero. Arbitrary unit (au) indicates relative gene expression normalized to the expression of reference genes. Paired Wilcoxon signed-rank test was used as the statistical test.

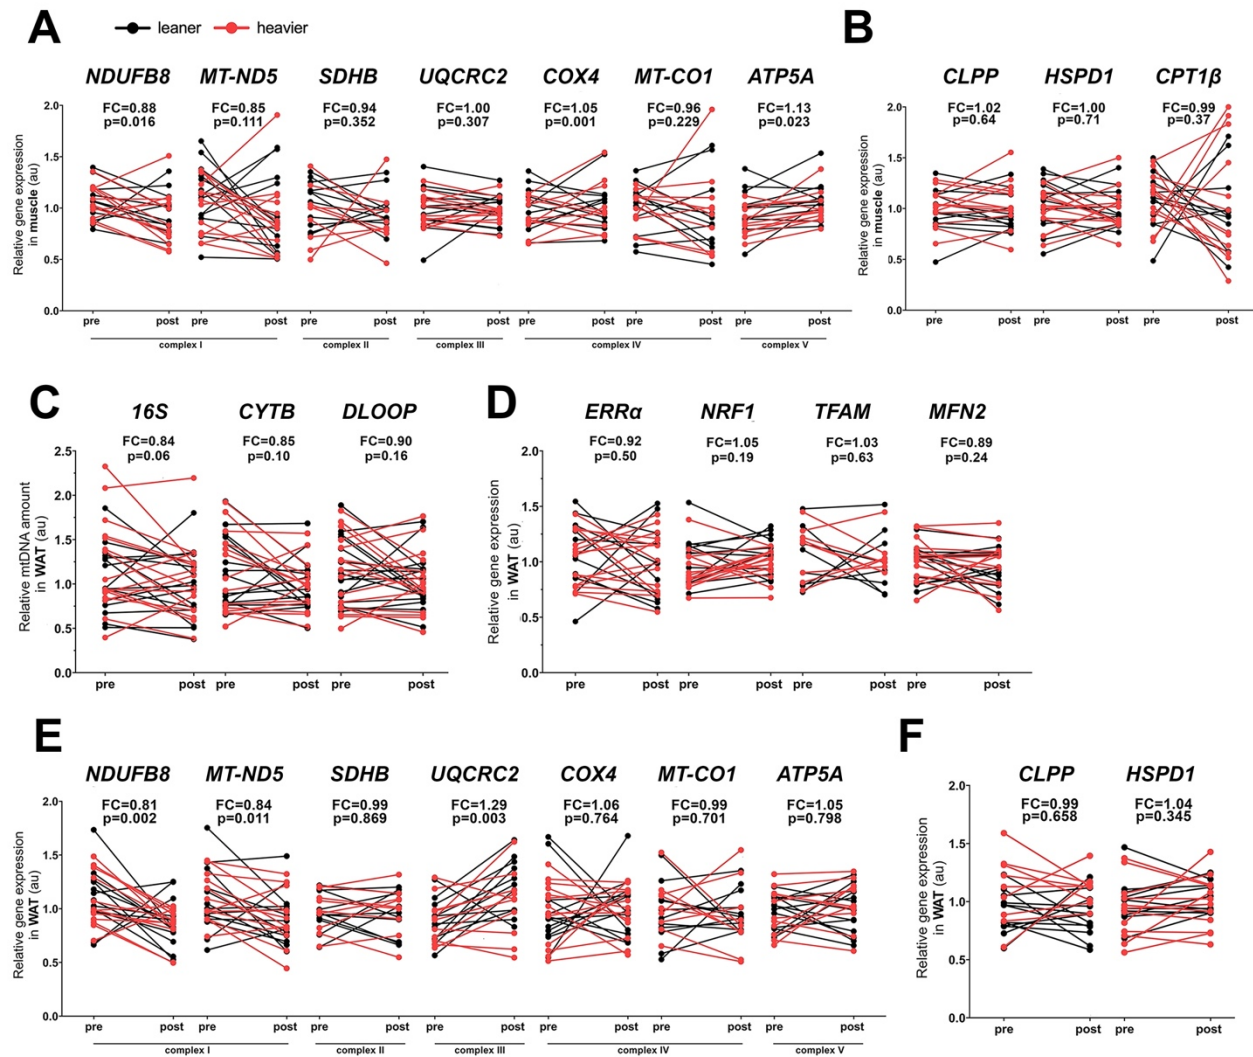

**Fig. S3. Expression of mitochondrial metabolism-related genes in muscle and WAT and WAT mitochondrial DNA amount before and after NR treatment in the twins from the BMI-discordant pairs. Related to Fig. 2. Number of analyzed study participants is presented as n=number of full twin pairs/number of individuals.**

**(A)** Gene expression of OXPHOS complex (I-V) subunits in muscle pre versus post NR (n= 10-13 pairs/21-26 individuals).

**(B)** Expression of mitochondrial quality control and fatty acid oxidation genes in muscle pre versus post NR (n= 11-13 pairs/23-26 individuals).

**(C)** Mitochondrial DNA amount in WAT pre versus post NR (n=14-15 pairs/28-31 individuals).

**(D)** Gene expression levels of the regulators of mitochondrial biogenesis in WAT pre versus post NR (n=10-13 pairs/21-27 individuals).

**(E)** Gene expression levels of OXPHOS complex (I-V) subunits in WAT pre vs post NR (n=9-13 pairs/19-26 individuals).

**(F)** Expression levels of mitochondrial quality control genes in WAT pre vs post NR (n= 11 pairs/22-23 individuals).

Pre and post value of each individual is connected with a line. The leaner cotwins are shown in black, the heavier cotwins in red. Fold change (FC) indicates the mean of the post NR values divided by the pre NR values. Paired Wilcoxon signed-rank test was used as the statistical test.

Arbitrary unit (au) indicates relative gene expression normalized to the expression of reference genes or mitochondrial amount expressed relative to nuclear genome amount. *NDUFB8*, NADH:ubiquinone oxidoreductase subunit B8; *MT-ND5*, mitochondrially encoded NADH dehydrogenase 5; *SDHB*, succinate dehydrogenase complex iron sulfur subunit B; *UQCRC2*, ubiquinol-cytochrome c reductase core protein 2; *MT-CO1*, mitochondrially encoded cytochrome c oxidase 1; *CLPP*, caseinolytic mitochondrial matrix peptidase proteolytic subunit; *HSPD1*, heat shock protein family D (Hsp60) member 1; *CPT1 $\beta$* , carnitine palmitoyltransferase 1B; *16S*, 16 rRNA; *CYTB*, cytochrome b and *DLOOP*, D-loop region.

**Table S1. The effect of NR on cardiovascular parameters in the twins from BMI-discordant pairs.**

Data are shown as mean  $\pm$  SD (normally distributed variables) or median (interquartile range, for skewed variables). P values were obtained using paired Wilcoxon signed-rank test to examine the effect of NR supplementation on clinical parameters in the twins from the BMI-discordant pairs (n=16 twin pairs/32 individuals). HDL, high-density lipoprotein; LDL, low-density lipoprotein; FFA, free fatty acids and BP, blood pressure.

| Variable<br>(unit)                      | All                       |                            | P Value | Leaner                    |                            | P Value | Heavier                   |                            | P Value |
|-----------------------------------------|---------------------------|----------------------------|---------|---------------------------|----------------------------|---------|---------------------------|----------------------------|---------|
|                                         | Pre (n=32<br>individuals) | Post (n=32<br>individuals) |         | Pre (n=16<br>individuals) | Post (n=16<br>individuals) |         | Pre (n=16<br>individuals) | Post (n=16<br>individuals) |         |
| Cholesterol<br>(total, mmol/l)          | 4.7 $\pm$ 0.8             | 4.7 $\pm$ 0.8              | 0.346   | 4.7 $\pm$ 0.7             | 4.7 $\pm$ 0.7              | 0.568   | 4.7 $\pm$ 0.9             | 4.8 $\pm$ 1.0              | 0.470   |
| HDL (mmol/l)                            | 1.3 (1.2 - 1.6)           | 1.2 (1.0 - 1.6)            | 0.049   | 1.4 (1.2 - 1.5)           | 1.3 (1.1 - 1.7)            | 0.093   | 1.3 (1.1 - 1.7)           | 1.2 (1.0 - 1.6)            | 0.289   |
| LDL (mmol/l)                            | 3.0 $\pm$ 0.8             | 3.0 $\pm$ 0.5              | 0.723   | 3.0 $\pm$ 0.7             | 3.0 $\pm$ 0.5              | 0.752   | 3.1 $\pm$ 0.8             | 3.0 $\pm$ 0.5              | 0.887   |
| Triglycerides<br>(mmol/l)               | 1.0 (0.7 - 1.2)           | 0.9 (0.8 - 1.3)            | 0.046   | 0.81 (0.6 - 1.0)          | 0.9 (0.7 - 1.1)            | 0.313   | 1.0 (0.7 - 1.3)           | 1.1 (0.8 - 1.4)            | 0.088   |
| FFA ( $\mu$ mol/l)                      | 444 (376 - 551)           | 431 (368 - 546)            | 0.229   | 415 (362 - 500)           | 392 (322 - 432)            | 0.561   | 510 (428 - 700)           | 483 (420 - 562)            | 0.252   |
| Systolic BP<br>(mmHg)                   | 133 $\pm$ 22              | 128 $\pm$ 19               | 0.531   | 131 $\pm$ 24              | 124 $\pm$ 19               | 0.683   | 135 $\pm$ 22              | 131 $\pm$ 19               | 0.753   |
| Diastolic BP<br>(mmHg)                  | 83 $\pm$ 12               | 83 $\pm$ 11                | 0.875   | 83 $\pm$ 12               | 81 $\pm$ 11                | 0.889   | 84 $\pm$ 11               | 84 $\pm$ 12                | 1.000   |
| Pulse (per<br>min)                      | 67 $\pm$ 11               | 67 $\pm$ 9                 | 0.629   | 65 $\pm$ 9                | 66 $\pm$ 9                 | 0.753   | 69 $\pm$ 12               | 69 $\pm$ 9                 | 0.806   |
| Hs-CRP (mg/l)                           | 1.9 (0.7 - 3.9)           | 1.6 (0.6 - 4.0)            | 0.655   | 1.7 (0.6 - 3.0)           | 1.1 (0.5 - 2.9)            | 0.561   | 2.3 (0.7 - 5.8)           | 2.5 (0.9 - 4.7)            | 0.978   |
| Total<br>homocysteine<br>( $\mu$ mol/l) | 11.0 (9.30 -12.0)         | 12.0 (10.0 - 14.0)         | 0.005   | 10.0 (9.55 -12.0)         | 12.0 (10.5 - 14.0)         | 0.003   | 11.0 (9.28 -12.8)         | 11.5 (10.3 - 14.0)         | 0.551   |

**Table S8. The effect of 5-month placebo and NR treatment in the twins from the BMI-concordant pairs.**

Data are shown as mean  $\pm$  SD (normally distributed variables) or median (interquartile range, for skewed variables). P values were obtained using paired Wilcoxon signed-rank test to examine the effect of placebo and NR treatment on anthropometric and clinical parameters in the twins from the BMI-concordant pairs (n= 4 pairs/8 individuals). HbA1c, hemoglobin A1c; HOMA, homeostasis model assessment; AUC, area under curve; OGTT, oral glucose tolerance test; HDL, high-density lipoprotein; LDL, low-density lipoprotein; FFA, free fatty acids; BP, blood pressure; AST, aspartate transaminase; MCV, mean corpuscular volume; MCH, mean corpuscular hemoglobin; MCHC, mean corpuscular hemoglobin concentration; fP, fasting plasma and Fe, iron.

| Variable (unit)                                | Placebo<br>Pre (n=4<br>individuals) | Placebo<br>Post (n=4<br>individuals) | P Value | Treated<br>Pre (n=4<br>individuals) | Treated<br>Post (n=4<br>individuals) | P Value |
|------------------------------------------------|-------------------------------------|--------------------------------------|---------|-------------------------------------|--------------------------------------|---------|
| BMI (kg/m <sup>2</sup> )                       | 31.5 $\pm$ 6.8                      | 32.6 $\pm$ 7.3                       | 0.125   | 32.0 $\pm$ 6.9                      | 32.1 $\pm$ 6.7                       | 0.875   |
| Weight (kg)                                    | 87.2 $\pm$ 12.2                     | 90.2 $\pm$ 13.2                      | 0.125   | 89.1 $\pm$ 16.6                     | 89.8 $\pm$ 15.2                      | 0.581   |
| Waist-hip ratio                                | 0.9 $\pm$ 0.0                       | 1.0 $\pm$ 0.0                        | 0.250   | 0.9 $\pm$ 0.0                       | 1.0 $\pm$ 0.1                        | 0.250   |
| Body fat (%)                                   | 34.1 $\pm$ 13.8                     | 38.0 $\pm$ 12.3                      | 0.250   | 33.2 $\pm$ 14.8                     | 35.8 $\pm$ 13.3                      | 0.750   |
| Visceral adipose tissue (cm <sup>3</sup> )     | 2017 $\pm$ 497                      | 2275 $\pm$ 521                       | 0.125   | 2217 $\pm$ 921                      | 2171 $\pm$ 861                       | 0.625   |
| Subcutaneous adipose tissue (cm <sup>3</sup> ) | 7297 $\pm$ 4799                     | 7568 $\pm$ 4950                      | 0.125   | 6996 $\pm$ 4831                     | 6833 $\pm$ 4751                      | 0.375   |
| Adipocyte cell number (per billion)            | 233 (197 - 308)                     | 289 (235 - 325)                      | 1.000   | 168 (147 - 204)                     | 315 (246 - 396)                      | 0.125   |
| Adipocyte cell diameter ( $\mu$ M)             | 89 $\pm$ 11                         | 99 $\pm$ 8.6                         | 0.375   | 96 $\pm$ 12                         | 90 $\pm$ 5.6                         | 0.125   |
| Adipocyte cell volume (pL)                     | 500 $\pm$ 154                       | 734 $\pm$ 161                        | 0.250   | 617 $\pm$ 219                       | 573 $\pm$ 123                        | 0.625   |
| Adipocyte cell weight (ng)                     | 407 (364 - 500)                     | 702 (589 - 785)                      | 0.250   | 584 (427 - 722)                     | 559 (495 - 587)                      | 0.625   |
| Liver fat (%)                                  | 5.2 (0.87 - 9.9)                    | 6.5 (1.5 - 12.0)                     | 0.181   | 3.4 (2.0 - 5.4)                     | 3.1 (1.9 - 4.8)                      | 0.125   |
| Lean tissue mass (kg)                          | 56.2 $\pm$ 5.5                      | 53.0 $\pm$ 8.8                       | 0.750   | 58.8 $\pm$ 4.9                      | 54.3 $\pm$ 9.7                       | 1.000   |
| Total bone mass (kg)                           | 3.2 $\pm$ 0.6                       | 3.0 $\pm$ 0.7                        | 0.500   | 3.3 $\pm$ 0.5                       | 3.0 $\pm$ 0.7                        | 0.250   |
| Basal metabolic rate (kcal/day)                | 1782 $\pm$ 266                      | 1813 $\pm$ 260                       | 0.250   | 1814 $\pm$ 298                      | 1842 $\pm$ 262                       | 0.125   |
| Caloric intake (kcal/day)                      | 1872 $\pm$ 419                      | 1423 $\pm$ 730                       | 0.250   | 2134 $\pm$ 883                      | 1831 $\pm$ 1120                      | 0.250   |
| Protein intake (g)                             | 81.5 (63.2 - 100.2)                 | 89.5 (61.6 - 91.8)                   | 1.000   | 84.0 (65.7 - 110.1)                 | 69.2 (47.3 - 89.9)                   | 0.125   |
| Fat intake (g)                                 | 69.8 $\pm$ 17.5                     | 52.7 $\pm$ 29.8                      | 0.250   | 87.1 $\pm$ 39.5                     | 70.2 $\pm$ 53.2                      | 0.250   |
| Carbohydrate intake (g)                        | 203.5 $\pm$ 44.4                    | 134.9 $\pm$ 66.8                     | 0.500   | 221.2 $\pm$ 93.2                    | 187.0 $\pm$ 131.5                    | 0.625   |
| Niacin equivalent (mg/day)                     | 32.5 (30.6 - 36.5)                  | 40.9 (29.1 - 44.1)                   | 1.000   | 35.8 (31.9 - 41.6)                  | 29.9 (21.7 - 37.7)                   | 0.125   |
| Physical activity (Total Baecke)               | 8.1 $\pm$ 0.7                       | 8.3 $\pm$ 1.5                        | 0.500   | 8.0 $\pm$ 1.7                       | 8.0 $\pm$ 1.5                        | 1.000   |
| Alcohol intake (doses/week)                    | 1.0 (0.5 - 1.4)                     | 0.0 (0.0 - 7.0)                      | 1.000   | 2.0 (0.0 - 4.6)                     | 0.0 (0.0 - 2.5)                      | 1.000   |
| Current smoker (number)                        | 2                                   | 1                                    | -       | 1                                   | 1                                    | -       |
| HbA1c (mmol/mol)                               | 34.5 (33.0 - 36.3)                  | 35.5 (34.5 - 36.3)                   | 1.000   | 36.5 (35.0 - 37.8)                  | 37.0 (35.5 - 38.5)                   | 0.371   |
| Fasting glucose (mmol/l)                       | 5.4 (5.0 - 5.8)                     | 5.4 (5.2 - 5.6)                      | 0.850   | 5.8 (5.6 - 5.4)                     | 5.4 (5.2 - 5.5)                      | 0.625   |
| Fasting insulin (mIU/l)                        | 7.7 (3.9 - 11.5)                    | 6.1 (.3 - 11.9)                      | 0.875   | 9.7 (4.1 - 14.9)                    | 10.4 (4.4 - 16.2)                    | 0.125   |
| Fasting C-peptide (nmol/l)                     | 0.7 (0.4 - 1.0)                     | 0.6 (0.4 - 1.0)                      | 0.875   | 0.8 (0.4 - 1.2)                     | 0.8 (0.4 - 1.1)                      | 0.250   |
| HOMA index                                     | 1.8 (1.0 - 2.7)                     | 1.5 (0.8 - 2.8)                      | 0.875   | 2.5 (1.0 - 3.8)                     | 2.4 (1.0 - 4.0)                      | 1.000   |
| Matsuda index                                  | 8.8 $\pm$ 6.9                       | 6.9 $\pm$ 5.0                        | 0.250   | 7.5 $\pm$ 6.5                       | 5.3 $\pm$ 4.5                        | 0.125   |
| Glucose AUC during OGTT                        | 14.8 $\pm$ 4.1                      | 15.4 $\pm$ 3.2                       | 0.875   | 16.8 $\pm$ 3.3                      | 24.4 $\pm$ 13.1                      | 0.625   |
| Insulin AUC during OGTT                        | 90 (30 - 161)                       | 107 (49 - 190)                       | 0.125   | 115 (39 - 188)                      | 108 (45 - 200)                       | 0.625   |
| Adiponectin ( $\mu$ g/ml)                      | 3.4 (2.8 - 6.8)                     | 3.2 (2.4 - 6.9)                      | 0.750   | 5.2 (3.6 - 6.9)                     | 5.0 (3.7 - 6.2)                      | 1.000   |
| Cholesterol (total, mmol/l)                    | 4.7 $\pm$ 0.5                       | 4.9 $\pm$ 0.5                        | 0.181   | 4.8 $\pm$ 0.8                       | 4.7 $\pm$ 0.5                        | 0.371   |
| HDL (mmol/l)                                   | 1.3 (1.2 - 1.4)                     | 1.4 (1.3 - 1.4)                      | 0.875   | 1.4 (1.2 - 1.6)                     | 1.3 (1.1 - 1.4)                      | 0.098   |
| LDL (mmol/l)                                   | 3.1 $\pm$ 0.41                      | 3.4 $\pm$ 0.57                       | 0.174   | 3.3 $\pm$ 0.45                      | 3.4 $\pm$ 0.47                       | 0.174   |
| Triglycerides (mmol/l)                         | 1.0 (0.9 - 1.0)                     | 1.0 (0.8 - 1.3)                      | 0.875   | 0.9 (0.7 - 1.2)                     | 0.9 (0.8 - 1.1)                      | 1.000   |
| FFA ( $\mu$ mol/l)                             | 427.7 (325.4 - 531.4)               | 415.3 (347.7 - 485.2)                | 0.625   | 394.1 (332.1 - 481.9)               | 456.3 (346.6 - 551.1)                | 0.625   |



|                                     |                       |                       |       |                       |                       |       |
|-------------------------------------|-----------------------|-----------------------|-------|-----------------------|-----------------------|-------|
| Systolic BP (mmHg)                  | 114 ± 12              | 122 ± 11              | 0.250 | 126 ± 8               | 129 ± 16              | 0.625 |
| Diastolic BP (mmHg)                 | 74 ± 9                | 80 ± 12               | 0.125 | 80 ± 5                | 82 ± 13               | 0.713 |
| Pulse (per min)                     | 63 ± 8                | 63 ± 13               | 1.000 | 61 ± 5                | 61 ± 13               | 0.875 |
| Hs-CRP (mg/l)                       | 1.6 (1.3 - 11)        | 2.0 (0.9 - 5.5)       | 0.250 | 1.0 (0.6 - 3.3)       | 0.4 (0.4 - 5.1)       | 1.000 |
| Total homocysteine (μmol/l)         | 13.0 (12.2 - 13.8)    | 14.0 (12.1 - 15.8)    | 0.414 | 12.5 (11.5 - 15.0)    | 13.5 (12.1 - 17.0)    | 0.198 |
| ALT (U/l)                           | 24 (18 - 39)          | 24 (21 - 33)          | 1.000 | 23 (22 - 28)          | 27 (21 - 34)          | 1.000 |
| AST (U/l)                           | 27 (25 - 30)          | 23 (22 - 26)          | 0.250 | 27 (24 - 30)          | 31 (26 - 34)          | 0.581 |
| Creatinine (μmol/l)                 | 74 ± 13               | 75 ± 8                | 0.875 | 79 ± 12               | 76 ± 5                | 0.625 |
| Hemoglobin (g/l)                    | 137 ± 10              | 132 ± 6               | 0.197 | 136 ± 13              | 130 ± 12              | 0.197 |
| Haematocrit (%)                     | 40.8 ± 2.9            | 39.5 ± 2.1            | 0.173 | 40.5 ± 3.9            | 38.5 ± 3.0            | 0.174 |
| Erythrocytes (x10 <sup>12</sup> /l) | 4.5 ± 0.4             | 4.5 ± 0.3             | 0.875 | 4.6 ± 0.5             | 4.5 ± 0.4             | 0.250 |
| MCV (fl)                            | 90.3 ± 2.1            | 88.3 ± 3.9            | 0.250 | 87.8 ± 4.2            | 86.3 ± 5.6            | 0.346 |
| MCH (pg)                            | 30.5 ± 1.0            | 29.8 ± 0.96           | 0.149 | 29.8 ± 1.7            | 29.0 ± 2.2            | 0.371 |
| MCHC (g/l)                          | 338.0 (335.5 - 339.8) | 335.0 (332.5 - 338.0) | 1.000 | 338.5 (334.5 - 342.5) | 335.5 (331.3 - 339.3) | 0.625 |
| Leukocytes (x10 <sup>9</sup> /l)    | 7.3 ± 3.0             | 7.0 ± 2.4             | 0.875 | 6.2 ± 1.7             | 6.0 ± 0.9             | 1.000 |
| Thrombocytes (x10 <sup>9</sup> /l)  | 234 ± 29              | 260 ± 48              | 0.197 | 260 ± 53              | 238 ± 31              | 0.375 |
| fP-Fe (μmol/l)                      | 20.0 ± 6.4            | 20.4 ± 3.2            | 1.000 | 20.0 ± 9.1            | 16.6 ± 5.1            | 0.875 |

**Table S9. The effect of NR on safety parameters in the twins from BMI-discordant pairs.**

Data are shown as mean  $\pm$  SD (normally distributed variables) or median (interquartile range, for skewed variables). P values were obtained using paired Wilcoxon signed-rank test to examine the effect of NR supplementation on safety measures in the twins from the BMI-discordant pairs (n=16 twin pairs/32 individuals). AST, aspartate transaminase; MCV, mean corpuscular volume; MCH, mean corpuscular hemoglobin; MCHC, mean corpuscular hemoglobin concentration; fP, fasting plasma and Fe, iron.

| Variable (unit)                     | All                    |                         | P Value | Leaner                 |                         | P Value | Heavier                |                         | P Value |
|-------------------------------------|------------------------|-------------------------|---------|------------------------|-------------------------|---------|------------------------|-------------------------|---------|
|                                     | Pre (n=32 individuals) | Post (n=32 individuals) |         | Pre (n=16 individuals) | Post (n=16 individuals) |         | Pre (n=16 individuals) | Post (n=16 individuals) |         |
| ALT (U/l)                           | 22 (18 - 43)           | 26 (17 - 43)            | 0.674   | 20 (17 - 34)           | 26 (19 - 36)            | 0.041   | 33 (20 - 49)           | 27 (17 - 44)            | 0.155   |
| AST (U/l)                           | 24 (22 - 31)           | 25 (21 - 30)            | 0.626   | 24 (20 - 29)           | 24 (21 - 35)            | 0.081   | 24 (23 - 31)           | 25 (22 - 28)            | 0.293   |
| Creatinine ( $\mu$ mol/l)           | 74 $\pm$ 13            | 74 $\pm$ 12             | 0.650   | 73 $\pm$ 14            | 75 $\pm$ 12             | 0.551   | 74 $\pm$ 13            | 74 $\pm$ 12             | 0.924   |
| Hemoglobin (g/l)                    | 142 $\pm$ 9            | 140 $\pm$ 9             | 0.043   | 142 $\pm$ 8            | 140 $\pm$ 8             | 0.312   | 143 $\pm$ 9            | 141 $\pm$ 10            | 0.073   |
| Haematocrit (%)                     | 42.0 $\pm$ 2.2         | 42.1 $\pm$ 2.2          | 0.641   | 41.9 $\pm$ 2.1         | 42.4 $\pm$ 1.9          | 0.212   | 42.1 $\pm$ 2.4         | 41.9 $\pm$ 2.6          | 0.668   |
| Erythrocytes ( $\times 10^{12}/l$ ) | 4.8 $\pm$ 0.3          | 4.8 $\pm$ 0.3           | 0.991   | 4.8 $\pm$ 0.37         | 4.8 $\pm$ 0.32          | 0.244   | 4.8 $\pm$ 0.31         | 4.8 $\pm$ 0.31          | 0.268   |
| MCV (fl)                            | 87.9 $\pm$ 3.5         | 88.0 $\pm$ 3.3          | 0.829   | 88.4 $\pm$ 4.2         | 88.3 $\pm$ 3.7          | 1.000   | 87.4 $\pm$ 2.6         | 87.7 $\pm$ 2.9          | 0.681   |
| MCH (pg)                            | 29.8 $\pm$ 1.3         | 29.4 $\pm$ 1.4          | 0.013   | 29.9 $\pm$ 1.5         | 29.3 $\pm$ 1.7          | 0.009   | 29.6 $\pm$ 1.2         | 29.6 $\pm$ 1.1          | 0.766   |
| MCHC (g/l)                          | 338 (334 - 342)        | 333 (330 - 340)         | 0.005   | 338 (334 - 342)        | 332 (327 - 338)         | 0.010   | 337 (335 - 342)        | 336 (331 - 341)         | 0.300   |
| Leukocytes ( $\times 10^9/l$ )      | 6.4 $\pm$ 1.5          | 6.3 $\pm$ 1.8           | 0.134   | 6.5 $\pm$ 1.8          | 6.3 $\pm$ 2.0           | 0.277   | 6.3 $\pm$ 1.2          | 6.3 $\pm$ 1.7           | 0.244   |
| Thrombocytes ( $\times 10^9/l$ )    | 243 $\pm$ 55           | 248 $\pm$ 62            | 0.199   | 244 $\pm$ 60           | 252 $\pm$ 72            | 0.301   | 241 $\pm$ 52           | 244 $\pm$ 52            | 0.569   |
| fP-Fe ( $\mu$ mol/l)                | 19.0 $\pm$ 6.9         | 16.7 $\pm$ 5.9          | 0.078   | 19.8 $\pm$ 7.6         | 16.6 $\pm$ 5.9          | 0.084   | 18.1 $\pm$ 6.3         | 16.7 $\pm$ 6.1          | 0.349   |

**Table S10. The primer sequences.**

| <b>Gene</b>                   | <b>Gene/target name</b>                                                         | <b>Forward (5' - 3')</b>  | <b>Reverse (5' - 3')</b> |
|-------------------------------|---------------------------------------------------------------------------------|---------------------------|--------------------------|
| <b>16S</b>                    | 16S rRNA<br>mitochondrial genomic area                                          | GGGGCGACCTCGGAGCAGAA      | ATAGCGGCTGCACCATCGGGA    |
| <b>CYTB</b>                   | Cytochrome B<br>mitochondrial genomic area                                      | GCCTGCCTGATCCTCCAAAT      | AAGGTAGCGGATGATTCAGCC    |
| <b>DLOOP</b>                  | 12S rRNA<br>mitochondrial genomic area                                          | CATCTGGTTCCTACTTCAGGG-3'  | CCGTGAGTGGTTAATAGGGTG    |
| <b>APP</b>                    | Amyloid beta precursor<br>protein<br>nuclear genomic area                       | TGTGTGCTCTCCCAGGTCTA      | CAGTTCTGGATGGTCACTGG     |
| <b>B2M</b>                    | Beta-2-microglobulin<br>nuclear genomic area                                    | TGCTGTCTCCATGTTTGATGTATCT | TCTCTGCTCCCCACCTCTAAGT   |
| <b>HPP</b>                    | Hemoglobin subunit beta<br>nuclear genomic area                                 | CAGGTACGGCTGTCATCAGTTAG   | CATGGTGTCTGTTTGAGGTTGCT  |
| <b>ACTB</b>                   | Actin                                                                           | GATGAGATTGGCATGGCTTT'     | CACCTTCACCGTTCCAGTTT     |
| <b>ATP5A</b>                  | ATP synthase $\alpha$                                                           | ATGACGACTTATCCAAACAGGC    | CGGGAGTGTAGGTAGAACACAT   |
| <b>B2M</b>                    | Beta-2-microglobulin                                                            | GAGGCTATCCAGCGTACTCCA     | CGGCAGGCATACTCATCTTTT    |
| <b>CLPP</b>                   | Caseinolytic mitochondrial<br>matrix peptidase proteolytic<br>subunit           | CCATCTACGACACGATGCAG      | CATGATCTCCTCTGCCTGA      |
| <b>COX4</b>                   | Cytochrome c oxidase<br>subunit 4                                               | GGTTTCACCGCGCTCGTTAT      | TGTCCAGCATCCTCTTGGTCTG   |
| <b>CPT1<math>\beta</math></b> | Carnitine<br>palmitoyltransferase 1B                                            | CATGTATCGCCGTAAGTGGAC     | TGGTAGGAGCACATAGGCACT    |
| <b>ERR<math>\alpha</math></b> | Estrogen-related receptor $\alpha$                                              | TATGGTGTGGCATCCTGTG       | GTCTCCGCTTGGTGATCTC      |
| <b>HSPD1</b>                  | Heat shock protein family D<br>(Hsp60) member                                   | CCAAGGAAGGCTTCGAGAAGAT    | CGTAGCAACCTGTGCAATTTCT   |
| <b>MFN2</b>                   | Mitofusin 2                                                                     | GGCCCAACTCTAAGTGCCC       | AAGTGCTTTTCCGTCTGCATC    |
| <b>MT-ND5</b>                 | Mitochondrially encoded<br>NADH: ubiquinone<br>oxidoreductase core<br>subunit 5 | AGGCGCTATCACCCTCTGTTG     | AACCTGTGAGGAAAGGTATTCT   |
| <b>MT-COX1</b>                | Mitochondrially encoded<br>cytochrome c oxidase I                               | GGATGCATACACCACATGAA      | AGCGAAGGCTTCTCAAATCA     |
| <b>MYF5</b>                   | Myogenic factor 5                                                               | TCACCTCCTCAGAGCAACCT      | ATTAGGCCCTCCTGGAAGAA     |
| <b>MYMK</b>                   | Myomaker, myogenic<br>fusion factor                                             | GACAAGAGCGTCTACACCCA      | AAGTGTAGTCCCAGTCTCAAAG   |
| <b>MYOD</b>                   | Myoblast determination<br>protein 1                                             | CCGCTTTTCTTAACCACAAA      | CAAAGTGCTGGCAGTCTGAA     |
| <b>MYOG</b>                   | Myogenin                                                                        | GCCAGACTATCCCCTTCCTC      | GAGGCCGCGTTATGATAAAA     |

|                                |                                                                             |                          |                         |
|--------------------------------|-----------------------------------------------------------------------------|--------------------------|-------------------------|
| <b>NAMPT</b>                   | Nicotinamide phosphoribosyltransferase                                      | CTTCGGTTCTGGTGGAGGTT     | TGTTGGGATCAGCAACTGGG    |
| <b>NAPRT</b>                   | Nicotinic acid phosphoribosyltransferase                                    | GACAGTGGTGACCTGCTACA     | ACTGGTGCCAATGCCAATGA    |
| <b>NDUFB8</b>                  | NADH:biquinone oxidoreductase subunit B8                                    | ACAGGAACCGTGTGGATACAT    | CCCCACCCAGCACATGAAT     |
| <b>NMNAT3</b>                  | Nicotinamide-nucleotide adenyltransferase 3                                 | GTTGCTGAGCCCTGCAAATAG    | GTGGCCACCCTGCTTATTAATTG |
| <b>NRF1</b>                    | Nuclear respiratory factor 1                                                | AGGAACACGGAGTGACCCAA     | TATGCTCGGTGTAAGTAGCCA   |
| <b>NRK1</b>                    | Nicotinamide riboside kinase 1                                              | TTTGGGAGGACTCGAACTGG     | CACTGTTTGTACACCACTGAT   |
| <b>PAX3</b>                    | Paired box 3                                                                | GGCTTTCAACCATCTCATTCCCG  | GTTGAGGTCTGTGAACGGTGCT  |
| <b>PAX7</b>                    | Paired box 7                                                                | GGAGGATGAAGCGGACAAGAAG   | AGGTCAGGTTCCGACTCCACAT  |
| <b>PGC1<math>\alpha</math></b> | Peroxisome proliferator-activated receptor gamma coactivator 1 $\alpha$     | AGCCTCTTTGCCAGATCTT      | GGCAATCCGTCTTCATCCAC    |
| <b>PPAR<math>\gamma</math></b> | Peroxisome proliferator activated receptor gamma                            | TACTGTCCGTTTCAGAAATGAC   | GTCAGCGGACTCTGGATTGAG   |
| <b>SDHB</b>                    | Succinate dehydrogenase complex iron sulfur subunit B                       | GCAGTCCATAGAAGAGCGTGAG-  | TGTCTCCGTTCCACCAGTAGCT  |
| <b>SIRT1</b>                   | Sirtuin 1                                                                   | AGGCCACGGATAGGTCCATA     | GTGGAGGTATTGTTTCCGGC    |
| <b>SIRT3</b>                   | Sirtuin 3                                                                   | ACCCAGTGGCATTCCAGAC      | GCTTGGGGTTGTGAAAGAAGAA  |
| <b>TFAM</b>                    | Transcription factor A                                                      | CCGAGGTGGTTTTTCATCTGT    | ACGCTGGGCAATTCTTCTAA    |
| <b>UQCRC2</b>                  | Ubiquinol-cytochrome c reductase core protein 2                             | CCGTGGAATTGAAGCAGTTGGTG  | CTGTGGTGACATTGAGCAGGAAC |
| <b>YWHAZ</b>                   | Tyrosine 3-monooxygenase/tryptophan 5-monooxygenase activation protein zeta | ACTTTTGGTACATTGTGGCTTCAA | CCGCCAGGACAAACCAGTAT    |
|                                | <i>Faecalibacterium prausnitzii</i> genomic area                            | GAGCCTCAGCGTTGGTT        | CCATGAACTGACTGTT        |
| <b>16S</b>                     | Gut microbiota 16S rRNA genomic area                                        | GTGYCAGCMGCCGGGGTAA      | GGACTACNVGGGTWTCTAAT    |

**Table S2 (Excel file). Differential methylation analysis comparing the response to NR supplementation within BMI-discordant twin pairs in muscle (n=12 pairs/24 individuals) and in WAT (n=14 pairs/28 individuals) (WAT starting row 624).** CpGs that were included in the analysis annotate to the selected list of mitochondrial and NAD<sup>+</sup> metabolism-related genes. A CpG was considered differentially methylated when FDR<0.05. The model was adjusted for age, sex, smoking, heavy/lean status and family relatedness. Related to Fig. 4.

**Table S3 (Excel file). Associations between CpG methylation and gene expression upon NR supplementation in muscle (n ranges from 7 to 11 full pairs/15 to 23 individuals) and in WAT (n ranges from 10 to 12 full pairs/21 to 25 individuals) in the twins from the BMI-discordant pairs (WAT starting row 566).**  $\beta$  values are standardized regression coefficients and represent the change in CpG methylation according to the change in gene expression upon NR. The regression model was adjusted for sex, age, smoking status and family relationship. Related to Fig. 4.

**Table S4 (Excel file). Metabolite abundances that were different after NR supplementation in the twins from the BMI-discordant pairs (n=14 pairs/28 individuals), nominal p<0.05.** The regression model was adjusted for age, sex, smoking, heavy/lean status and family relatedness. Related to Fig. 5.

**Table S5 (Excel file). Changes in the metabolite abundances that were different after NR supplementation between the leaner and the heavier cotwins from the BMI-discordant pairs (n=14 pairs/28 individuals), nominal p value <0.05.** The regression model was adjusted for age, sex, smoking, heavy/lean status and family relatedness. Related to Fig. 5.

**Table S6 (Excel file). Changes in the microbiota abundances after NR supplementation between the leaner and the heavier cotwins from the BMI-discordant pairs (n=11 pairs/22 individuals).** The regression model was adjusted for age, sex, smoking, heavy/lean status and family relatedness. Related to Fig. 6.

**Table S7 (Excel file). Associations of microbiota composition with NAD metabolites, blood clinical variables and plasma metabolites in the twins from the BMI-discordant pairs (n=11 pairs/22 individuals).**  $\beta$  values are standardized regression coefficients and represent i) the change in blood NAD metabolites according to the baseline microbiota composition and ii) the change in blood NAD metabolites, the change plasma clinical variables and the change in plasma metabolites according to the change in microbiota after NR treatment. The regression model was adjusted for sex, age, smoking status and family relationship. Related to Fig. 6.
